# Supplementary figures and images for: Protective Effects of Eicosapentaenoic Acid on the Glomerular Endothelium via Inhibition of EndMT in Diabetes
Source: Hindawi journal article supplement (doi:10.1155/2021/2182225), 2021-12-24

Supplementary Figure 1

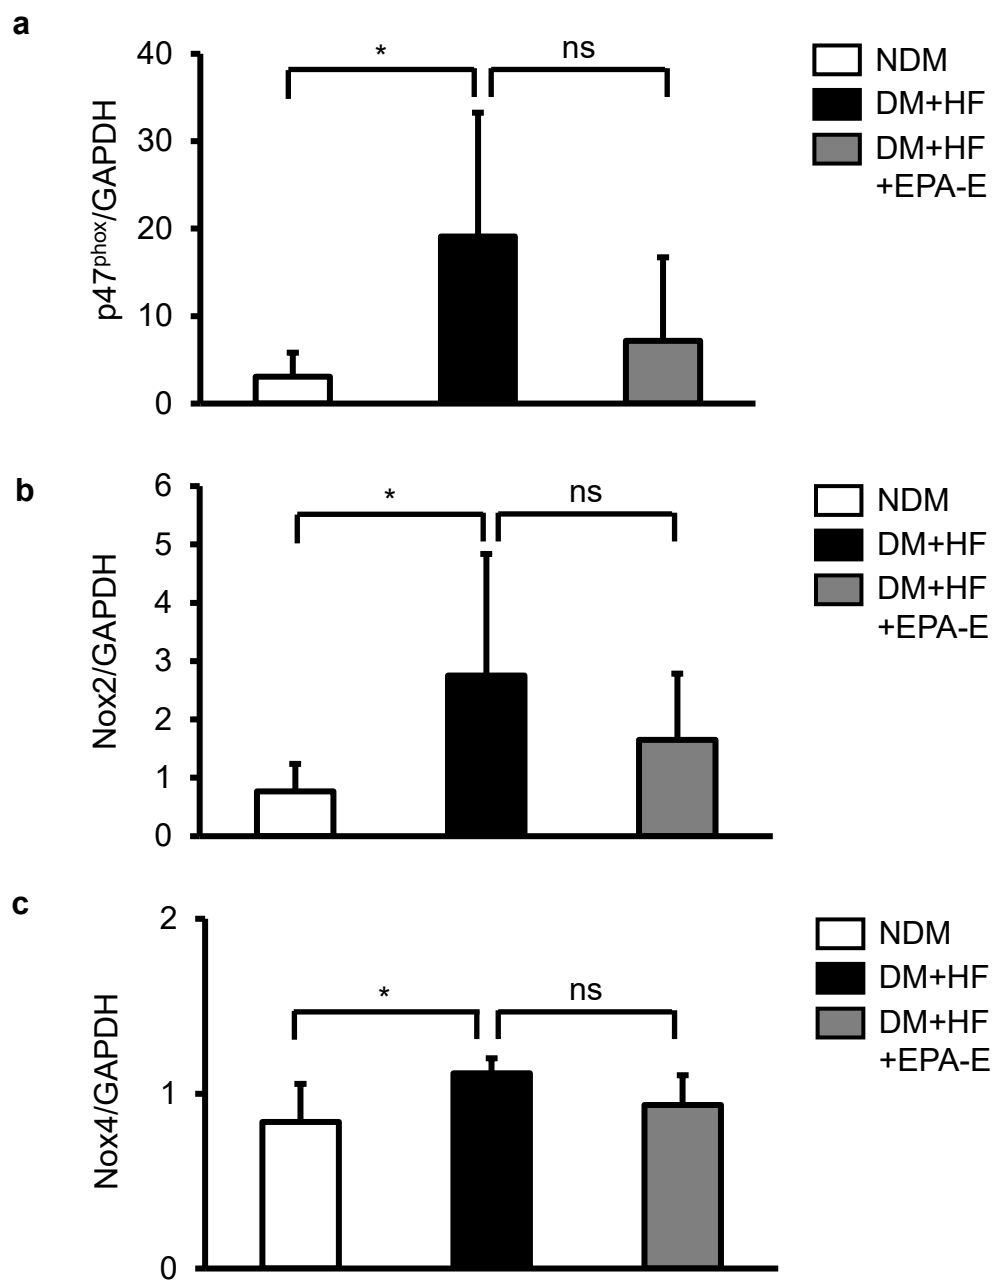

Supplement: f1 [file 2182225.f1.zip]

Supplementary Figure2

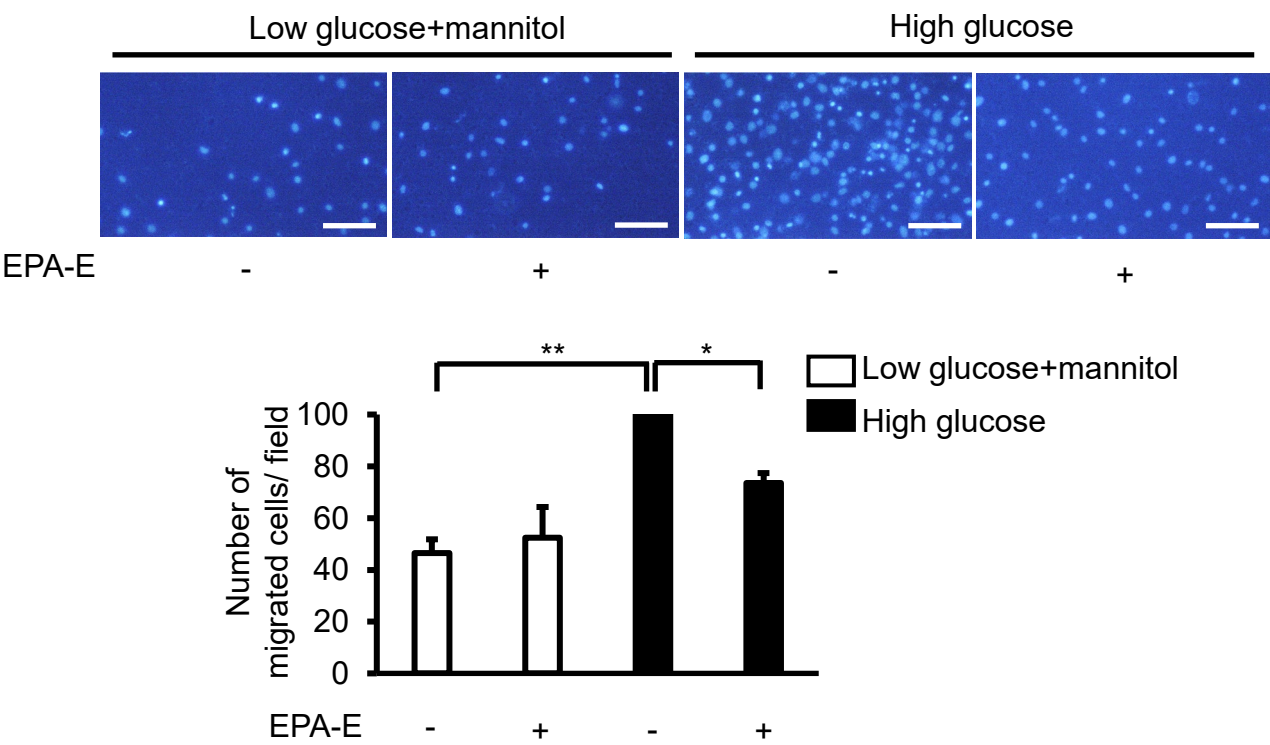

Supplement: f1 [file 2182225.f1.zip]

Supplementary Figure 4

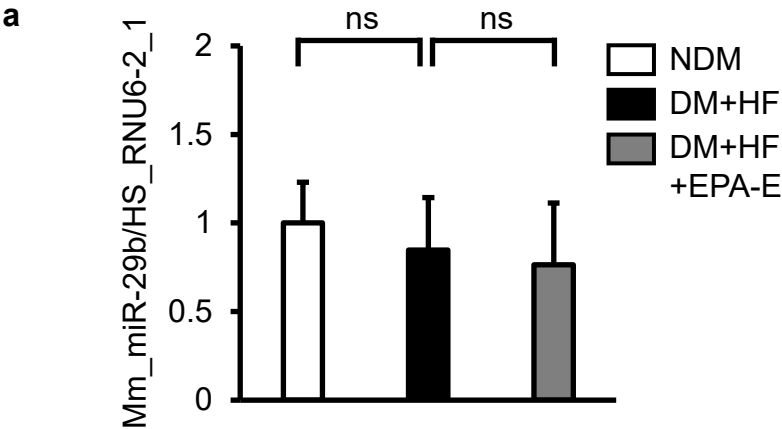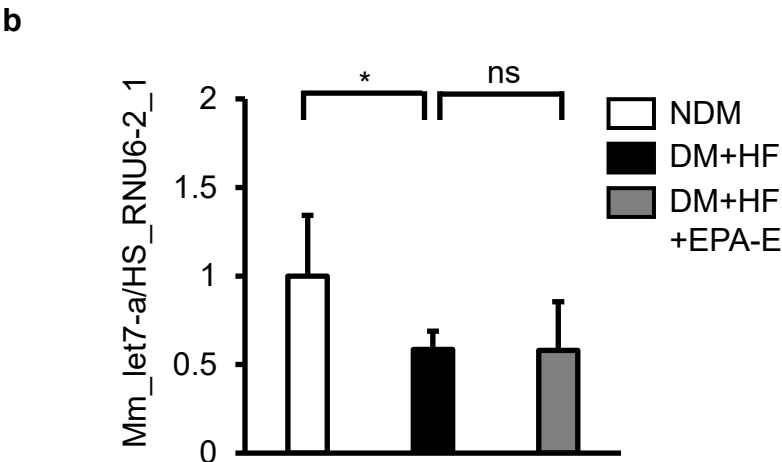

Supplement: f1 [file 2182225.f1.zip]

Supplementary Figure 3

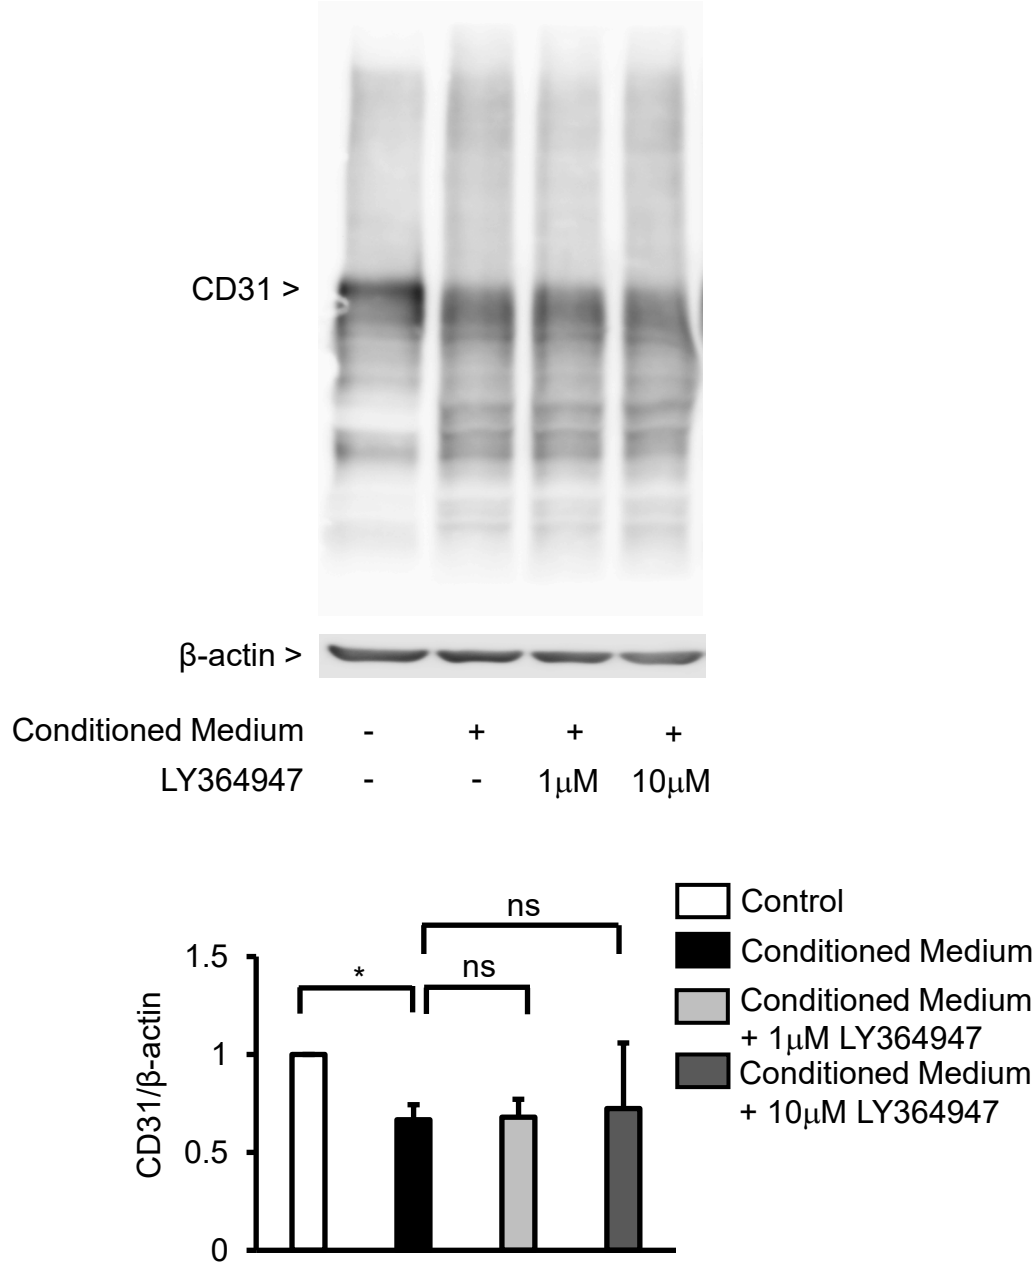

Supplement: f1 [file 2182225.f1.zip]
